# Supplementary material for: The role of the uncinate fasciculus in the risk-architecture of bipolar disorders: A meta-analysis
Source: bioRxiv or medRxiv preprint supplement (doi:10.1101/2021.07.06.21260113), 2021-07-08
Supplement: Supplementary file [file media-1.pdf]

**The Role of the Uncinate  
Fasciculus in the Risk-  
Architecture of Bipolar Disorders:  
A Meta-Analysis**

*Supplemental Information*

Prior to removing the one outlier<sup>17</sup>, we observed lower fractional anisotropy (FA) in the left and right uncinate fasciculus (UF) in individuals with bipolar disorder compared to healthy volunteers (**Supplementary Figures S1-S3**). The estimated weighted mean difference in FA was -0.27 (95% CI = [-0.47, -0.07],  $p = 0.009$ ; **Supplementary Figure S2**) in the left and -0.36 (95% CI = [-0.51, -0.21],  $p < 0.0001$ ; **Supplementary Figure S3**) in the right UF. Jackknife sensitivity analysis found that no single study drove these results for either the left or right UF. However, Egger's test revealed significant funnel plot asymmetry in the left ( $z = -4.33$ ,  $p < 0.0001$ ) and right UF ( $z = -2.76$ ,  $p = 0.006$ ).

**Table S1.** Characteristics of bipolar disorder studies included in the region-of-interest meta-analyses. All studies reported at least fractional anisotropy data, and a subset also reported radial diffusivity data. HDRS was converted to an estimated 17-item score if the 21- or 25-item scales were used.

| Study                            | DTI Processing Pipeline | RD | Individuals with Bipolar Disorder |                  |            |                          |         |                                                 |      |         |                      |                 |                       | Healthy Volunteers |                  |            |
|----------------------------------|-------------------------|----|-----------------------------------|------------------|------------|--------------------------|---------|-------------------------------------------------|------|---------|----------------------|-----------------|-----------------------|--------------------|------------------|------------|
|                                  |                         |    | <i>n</i>                          | Mean Age (Years) | Female (%) | Illness Duration (Years) | Subtype | Mood State                                      | YMRS | HDRS-17 | Comorbid Anxiety (%) | Lithium Use (%) | Antipsychotic Use (%) | <i>n</i>           | Mean Age (Years) | Female (%) |
| Benedetti 2011 <sup>1</sup>      | Tractography            | X  | 15                                | 48.4             | 66.7       | 12.4                     | BD-I    | Euthymic                                        | -    | -       | 0.0                  | 53.5            | 40.0                  | 21                 | 46.4             | 47.6       |
| Cabeen 2018 <sup>3</sup>         | Tractography            | X  | 26                                | 13.9             | 30.8       | -                        | BD-I    | 69% Euthymic, 11.5% Depressed, 8% Elevated      | 7.3  | -       | 19.2                 | 31.0            | 60.0                  | 26                 | 13.9             | 34.6       |
| Deng 2018 <sup>4</sup>           | Tractography            |    | 29                                | 25.7             | 27.6       | 3.9                      | -       | Depressed                                       | 2.3  | 20.3    | -                    | 0.0             | 0.0                   | 44                 | 28.3             | 38.6       |
| Dev 2017 <sup>5</sup>            | TBSS                    |    | 33                                | 46.3             | 73.0       | -                        | -       | Euthymic                                        | 1.18 | 4.50    | 0.0                  | -               | -                     | 38                 | 48.8             | 55.0       |
| Emsell 2014 <sup>6</sup>         | Tractography            | X  | 19                                | 43.3             | 52.6       | 15.6                     | BD-I    | Euthymic                                        | -    | -       | 5.3                  | 47.4            | 15.8                  | 18                 | 41.7             | 44.4       |
| Favre 2016 <sup>7</sup>          | Tractography            |    | 24                                | 45.2             | 50.0       | 17.8                     | -       | Euthymic                                        | 2.79 | -       | 0.0                  | 47.0            | 9.0                   | 12                 | 43.6             | 66.7       |
| Foley 2018 <sup>8</sup>          | Tractography            |    | 32                                | 45               | 68.0       | 26.0                     | BD-I    | Euthymic                                        | 2.72 | 3.50    | 31.0                 | 25.0            | 63.0                  | 40                 | 43.5             | 60.0       |
| Hermens 2018 <sup>9</sup>        | TBSS                    |    | 76                                | 22.2             | 76.3       | 7.0                      | -       | 59.2% Euthymic, 22.4% Depressed, 14.5% Elevated | 6.00 | 11.7    | 35.0                 | -               | 55.3                  | 59                 | 23.8             | 64.4       |
| Houenou 2007 <sup>10</sup>       | Tractography            |    | 16                                | 41.9             | 50.0       | 23.8                     | -       | Euthymic                                        | 0.69 | 1.60    | 6.3                  | 87.5            | 56.3                  | 16                 | 40.5             | 43.8       |
| Ji 2017 <sup>11</sup>            | Tractography            |    | 72                                | 26.2             | 61.1       | 8.6                      | BD-I    | 91.7% Euthymic, 8.3% Elevated                   | 4.88 | -       | 45.8                 | -               | -                     | 30                 | 26.1             | 46.7       |
| Knochel 2014 <sup>12</sup>       | TBSS                    |    | 21                                | 35.7             | 42.9       | 7.6                      | BD-I    | -                                               | -    | -       | 0.0                  | -               | -                     | 21                 | 37.0             | 38.1       |
| Koshiyama 2020 <sup>13</sup>     | TBSS                    | X  | 211                               | 45.7             | 50.2       | -                        | -       | -                                               | -    | -       | -                    | -               | -                     | 844                | 36.7             | 46.0       |
| Lin 2011 <sup>14</sup>           | Tractography            |    | 18                                | 28.5             | 66.7       | 1.3                      | -       | 11.1% Euthymic, 88.9% Depressed                 | -    | -       | 0.0                  | 61.1            | -                     | 16                 | 29.9             | 75.0       |
| Linke 2013 <sup>15</sup>         | TBSS                    | X  | 19                                | 45.0             | 57.9       | 15.4                     | BD-I    | Euthymic                                        | 0.90 | 0.70    | 10.5                 | 31.6            | 0.0                   | 19                 | 45.0             | 57.9       |
| Linke 2020 <sup>16</sup>         | Tractography            | X  | 36                                | 16.8             | 47.2       | -                        | -       | 86.1% Euthymic, 12.5% Depressed, 1.4% Elevated  | 5.90 | -       | 44.4                 | 33.3            | 50.0                  | 36                 | 15.0             | 55.6       |
| Mahapatra 2017 <sup>17</sup>     | Tractography            |    | 16                                | 29.8             | 43.8       | 3.8                      | BD-I    | Euthymic                                        | 4.63 | 6.30    | 0.0                  | 37.5            | 75.0                  | 15                 | 29.8             | 40.0       |
| Mamah 2019 <sup>18</sup>         | TBSS                    |    | 33                                | 26.5             | 45.5       | 9.9                      | BD-I    | -                                               | 3.50 | -       | -                    | 18.2            | -                     | 30                 | 24.5             | 50.0       |
| McIntosh 2008 <sup>19</sup>      | Tractography            |    | 40                                | 39.9             | 47.5       | 18.8                     | -       | -                                               | 0.60 | 2.40    | -                    | 55.0            | 45.0                  | 49                 | 35.3             | 42.9       |
| McKenna 2015 <sup>20</sup>       | TBSS                    |    | 26                                | 45.2             | 69.0       | 25.9                     | BD-I    | Euthymic                                        | 1.23 | 3.20    | 0.0                  | 31.0            | 54.0                  | 36                 | 46.3             | 53.0       |
| Moser 2018 <sup>21</sup>         | TBSS                    |    | 37                                | 27.2             | 32.4       | 6.3                      | BD-I    | -                                               | -    | -       | -                    | 40.5            | 81.1                  | 48                 | 29.8             | 41.7       |
| Saricicek 2016 <sup>22</sup>     | TBSS                    |    | 27                                | 34.8             | 59.3       | 10.3                     | BD-I    | Euthymic                                        | -    | -       | 0.0                  | 59.3            | 59.3                  | 29                 | 33.7             | 58.6       |
| Sarrazin 2014 <sup>23</sup>      | Tractography            |    | 118                               | 36.3             | 60.2       | 15.6                     | BD-I    | 67.8% Euthymic, 3.8% Depressed, 28.4% Elevated  | 2.58 | 9.90    | -                    | 33.1            | 44.1                  | 86                 | 37.3             | 52.3       |
| Scholz 2016 <sup>24</sup>        | TBSS                    |    | 24                                | 44.0             | 41.7       | 21.9                     | BD-I    | Euthymic                                        | 0.63 | 1.20    | 0.0                  | 50.0            | 0.0                   | 24                 | 44.0             | 41.7       |
| Souza-Queiroz 2016 <sup>26</sup> | Tractography            |    | 32                                | 35.8             | 37.5       | 15.5                     | -       | -                                               | 3.90 | -       | 15.0                 | 89.0            | 93.0                  | 47                 | 36.4             | 53.2       |
| Sprooten 2013 <sup>27</sup>      | TBSS                    |    | 61                                | 31.7             | 71.9       | 10.0                     | BD-I    | Euthymic                                        | 1.00 | 2.00    | 46.9                 | 18.8            | 35.9                  | 43                 | 30.1             | 67.4       |
| Teixeira 2014 <sup>28</sup>      | TBSS                    |    | 18                                | 12.3             | 33.3       | 2.8                      | -       | 44.4% Euthymic, 11.1% Depressed, 44.4% Elevated | 8.70 | -       | 50.0                 | 0.0             | 0.0                   | 20                 | 12.7             | 33.3       |
| Tonnesen 2018 <sup>29</sup>      | TBSS                    | X  | 61                                | 31.7             | 52.5       | 10.2                     | -       | -                                               | -    | -       | -                    | 25.0            | 64.6                  | 293                | 31.9             | 41.3       |
| Versace 2014 <sup>31</sup>       | Tractography            | X  | 24                                | 33.2             | 66.7       | 13.8                     | BD-I    | Euthymic                                        | 2.30 | 5.60    | 45.8                 | -               | 58.3                  | 19                 | 34.0             | 52.6       |
| Yip 2013 <sup>33</sup>           | TBSS                    |    | 38                                | 20.9             | 47.0       | -                        | BD-II   | Euthymic                                        | 1.80 | 6.10    | -                    | 0.0             | 0.0                   | 37                 | 21.2             | 46.0       |

**Abbreviations:** **BD-I**, bipolar disorder type I; **BD-II**, bipolar disorder type II; **HDRS-17**, Hamilton Depression Rating Scale, 17-item; **RD**, radial diffusivity; **YMRS**, Young Mania Rating Scale.

**Table S2.** Characteristics of studies comparing individuals at-risk for bipolar disorder with healthy volunteers. All studies reported fractional anisotropy data, and a subset also reported radial diffusivity data.

| Study                        | At-Risk Relatives |                            |               |                  |            | Healthy Volunteers |                  |            |
|------------------------------|-------------------|----------------------------|---------------|------------------|------------|--------------------|------------------|------------|
|                              | <i>n</i>          | Index Relationship         | Index BD Type | Mean Age (Years) | Female (%) | <i>n</i>           | Mean Age (Years) | Female (%) |
| Besenek 2019 <sup>2</sup>    | 19                | Offspring                  | BD-I, BD-II   | 14.3             | 47.4       | 19                 | 17.4             | 31.6       |
| Emsell 2014 <sup>6</sup>     | 21                | Not Specified <sup>1</sup> | BD-I          | 42.5             | 42.9       | 18                 | 41.7             | 44.4       |
| Foley 2018 <sup>8</sup>      | 17                | Siblings                   | BD-I, BD-II   | 47.2             | 53.0       | 40                 | 43.5             | 60.0       |
| Linke 2013 <sup>15</sup>     | 22                | Not Specified <sup>1</sup> | BD-I          | 28.0             | 50.0       | 22                 | 28.0             | 50.0       |
| Linke 2020 <sup>16</sup>     | 36                | Offspring, Siblings        | BD-I, BD-II   | 14.0             | 47.2       | 36                 | 15.0             | 55.6       |
| Mahapatra 2017 <sup>17</sup> | 15                | Not Specified <sup>1</sup> | BD-I          | 30.9             | 40.0       | 15                 | 29.8             | 40.0       |
| Saricicek 2016 <sup>22</sup> | 20                | Siblings                   | BD-I          | 36.3             | 50.0       | 29                 | 33.7             | 58.6       |
| Shakeel 2020 <sup>25</sup>   | 27                | Not Specified <sup>1</sup> | BD-NOS        | 18.5             | 63.3       | 33                 | 19.1             | 50.0       |
| Sprooten 2013 <sup>27</sup>  | 59                | Siblings                   | BD-I          | 30.4             | 60.0       | 43                 | 30.1             | 67.4       |
| Teixeira 2014 <sup>28</sup>  | 18                | Offspring                  | BD-I          | 12.7             | 50.0       | 20                 | 12.7             | 33.3       |
| Versace 2018 <sup>32</sup>   | 35                | Offspring                  | BD-NOS        | 13.7             | 48.6       | 39                 | 14.0             | 41.0       |

**Abbreviations:** **BD-I**, bipolar disorder type I; **BD-II**, bipolar disorder type II; **BD-NOS**, bipolar disorder not otherwise specified.

<sup>1</sup> At-risk individuals were unaffected individuals with a first-degree relative with bipolar disorder.

**Table S3.** Newcastle-Ottawa Quality Assessment Scale (Adapted for this Meta-Analysis). A study can be awarded a maximum of one point for each numbered item within the Selection and Exposure categories. A maximum of two points can be given for Comparability.

|                      |                                                                                                                                                                                                                                                                                                                                                                                                                                                                                                                                                                                                                                                                                                                                                                                                                                                                                                                                                                                                                                                                                                                                                                                                                                                                                 |
|----------------------|---------------------------------------------------------------------------------------------------------------------------------------------------------------------------------------------------------------------------------------------------------------------------------------------------------------------------------------------------------------------------------------------------------------------------------------------------------------------------------------------------------------------------------------------------------------------------------------------------------------------------------------------------------------------------------------------------------------------------------------------------------------------------------------------------------------------------------------------------------------------------------------------------------------------------------------------------------------------------------------------------------------------------------------------------------------------------------------------------------------------------------------------------------------------------------------------------------------------------------------------------------------------------------|
| <b>Selection</b>     | <ol style="list-style-type: none"> <li>1) <u>Is the case definition (diagnosis of BD) adequate?</u> <ol style="list-style-type: none"> <li>a) <b>1 point: clinician interview was conducted</b> (e.g., SCID, K-SADs)</li> <li>b) <b>0 points:</b> chart review or self-report</li> </ol> </li> <li>2) <u>Representativeness of cases</u> <ol style="list-style-type: none"> <li>a) <b>1 point: broad inclusion criteria</b>, e.g., <i>all</i> youth or <i>all</i> adults with BD, or patients with BD identified from inpatient and outpatient visits</li> <li>b) <b>0 points:</b> restrictive exclusion criteria, e.g., only age 60+ adults with BD, only patients with first-time mania, only unmedicated patients with BD, only patients with BD taking lithium, or only patients with BD with no other psychiatric comorbidities</li> </ol> </li> <li>3) <u>Selection of controls</u> <ol style="list-style-type: none"> <li>a) <b>1 point: community controls</b></li> <li>b) <b>0 points:</b> hospital controls or no description</li> </ol> </li> <li>4) <u>Definition of controls</u> <ol style="list-style-type: none"> <li>a) <b>1 point: no history of bipolar or other psychiatric disorders</b></li> <li>b) <b>0 points:</b> no description</li> </ol> </li> </ol> |
| <b>Comparability</b> | <ol style="list-style-type: none"> <li>1) <u>Comparability of cases and controls on basis of design or analysis</u> <ol style="list-style-type: none"> <li>a) <b>2 points: study controls for age and sex (or two other variables)</b>, either by matching during patient and control recruitment or by adjusting for confounders in the analysis</li> <li>b) <b>1 point: only one confounder</b> was controlled for</li> <li>c) <b>0 points:</b> no significant difference between groups, but the confounders were not included in statistical analyses (e.g., age, and sex were not used as covariates in analysis and authors simply state there was no significant difference in those variables between groups)</li> </ol> </li> </ol>                                                                                                                                                                                                                                                                                                                                                                                                                                                                                                                                    |
| <b>Exposure</b>      | <ol style="list-style-type: none"> <li>1) <u>Ascertainment of exposure</u> <ol style="list-style-type: none"> <li>a) <b>1 point:</b> DTI data acquired; data processed and analyzed in blinded fashion<br/><b>Note: ALL studies received 1 point for this criterion</b></li> </ol> </li> <li>2) <u>Same method of ascertainment (i.e. DTI imaging) for cases and controls</u> <ol style="list-style-type: none"> <li>a) <b>1 point: ALL studies received 1 point for this criterion</b></li> </ol> </li> <li>3) <u>Non-response rate</u> <ol style="list-style-type: none"> <li>a) <b>1 point: no patient DTI data was excluded due to motion artifact or other reasons</b>, or an equal proportion of data was excluded for both patients and controls</li> <li>b) <b>0 points:</b> inverse of the above statement</li> </ol> </li> </ol>                                                                                                                                                                                                                                                                                                                                                                                                                                      |

**Table S4.** Assessment of study quality using the Newcastle-Ottawa Scale.

| Study                            | Quality Indices |   |   |   |   |   |   |   | Total |
|----------------------------------|-----------------|---|---|---|---|---|---|---|-------|
|                                  | A               | B | C | D | E | F | G | H |       |
| Benedetti 2011 <sup>1</sup>      | 1               | 0 | 0 | 1 | 2 | 1 | 1 | 1 | 7     |
| Besenek 2019 <sup>2</sup>        | 1               | 0 | 0 | 1 | 2 | 1 | 1 | 1 | 7     |
| Cabeen 2018 <sup>3</sup>         | 1               | 1 | 0 | 1 | 2 | 1 | 1 | 1 | 8     |
| Deng 2018 <sup>4</sup>           | 1               | 0 | 0 | 1 | 2 | 1 | 1 | 0 | 6     |
| Dev 2017 <sup>5</sup>            | 1               | 0 | 0 | 0 | 2 | 1 | 1 | 1 | 6     |
| Emsell 2014 <sup>6</sup>         | 1               | 0 | 1 | 0 | 2 | 1 | 1 | 1 | 7     |
| Favre 2016 <sup>7</sup>          | 1               | 0 | 1 | 1 | 2 | 1 | 1 | 1 | 8     |
| Foley 2018 <sup>8</sup>          | 0               | 0 | 1 | 1 | 2 | 1 | 1 | 1 | 7     |
| Hermens 2018 <sup>9</sup>        | 1               | 1 | 1 | 1 | 2 | 1 | 1 | 1 | 9     |
| Houenou 2007 <sup>10</sup>       | 0               | 0 | 1 | 1 | 2 | 1 | 1 | 1 | 7     |
| Ji 2017 <sup>11</sup>            | 1               | 1 | 1 | 1 | 2 | 1 | 1 | 1 | 9     |
| Knochel 2014 <sup>12</sup>       | 1               | 0 | 0 | 1 | 2 | 1 | 1 | 1 | 7     |
| Koshiyama 2020 <sup>13</sup>     | 1               | 0 | 1 | 1 | 2 | 1 | 1 | 0 | 7     |
| Lin 2011 <sup>14</sup>           | 1               | 1 | 1 | 1 | 2 | 1 | 1 | 1 | 9     |
| Linke 2013 <sup>15</sup>         | 0               | 1 | 1 | 1 | 2 | 1 | 1 | 1 | 8     |
| Linke 2020 <sup>16</sup>         | 1               | 1 | 0 | 0 | 2 | 1 | 1 | 1 | 7     |
| Mahapatra 2017 <sup>17</sup>     | 0               | 0 | 0 | 1 | 2 | 1 | 1 | 1 | 6     |
| Mamah 2019 <sup>18</sup>         | 1               | 0 | 0 | 1 | 2 | 1 | 1 | 1 | 7     |
| McIntosh 2008 <sup>19</sup>      | 1               | 1 | 1 | 0 | 2 | 1 | 1 | 1 | 8     |
| McKenna 2015 <sup>20</sup>       | 1               | 0 | 1 | 1 | 2 | 1 | 1 | 1 | 8     |
| Moser 2018 <sup>21</sup>         | 1               | 1 | 1 | 1 | 2 | 1 | 1 | 1 | 9     |
| Saricicek 2016 <sup>22</sup>     | 1               | 0 | 0 | 1 | 2 | 1 | 1 | 1 | 7     |
| Sarrazin 2014 <sup>23</sup>      | 1               | 1 | 1 | 1 | 2 | 1 | 1 | 1 | 9     |
| Scholz 2016 <sup>24</sup>        | 1               | 0 | 1 | 1 | 2 | 1 | 1 | 1 | 8     |
| Shakeel 2020 <sup>25</sup>       | 1               | 0 | 1 | 0 | 2 | 1 | 1 | 1 | 7     |
| Souza-Queiroz 2016 <sup>26</sup> | 1               | 1 | 1 | 1 | 2 | 1 | 1 | 0 | 8     |
| Sprooten 2013 <sup>27</sup>      | 1               | 0 | 0 | 1 | 2 | 1 | 1 | 0 | 6     |
| Teixeira 2014 <sup>28</sup>      | 1               | 0 | 1 | 1 | 2 | 1 | 1 | 1 | 8     |
| Tonnesen 2018 <sup>29</sup>      | 1               | 1 | 1 | 0 | 2 | 1 | 1 | 0 | 7     |
| Tonnesen 2020 <sup>30</sup>      | 0               | 1 | 0 | 0 | 2 | 1 | 1 | 0 | 5     |
| Versace 2014 <sup>31</sup>       | 1               | 0 | 1 | 1 | 2 | 1 | 1 | 1 | 8     |
| Versace 2018 <sup>32</sup>       | 1               | 0 | 1 | 1 | 2 | 1 | 1 | 0 | 7     |
| Yip 2013 <sup>33</sup>           | 0               | 0 | 1 | 1 | 2 | 1 | 1 | 1 | 7     |

**Abbreviations:** A, Adequate definition of case; B, Representativeness of cases; C, Selection of control group; D, Definition of control group; E, Control for important confounding factors (e.g., age); F, Exposure assessment; G, Same method of ascertainment for cases and controls; H, Comparable number of cases and controls excluded due to motion

**Table S5.** Uncorrected p-values for null findings in inter-study heterogeneity.

|                                | <b>Left UF</b>            |          | <b>Right UF</b>           |          |
|--------------------------------|---------------------------|----------|---------------------------|----------|
|                                | <b><math>\beta</math></b> | <b>p</b> | <b><math>\beta</math></b> | <b>p</b> |
| <b>Age</b>                     | 0.00                      | 0.757    | -0.01                     | 0.115    |
| <b>Sex</b>                     | 0.00                      | 0.794    | 0.00                      | 0.380    |
| <b>Lithium Use</b>             | 0.00                      | 0.987    | 0.00                      | 0.682    |
| <b>Antipsychotic Use</b>       | 0.00                      | 0.528    | 0.00                      | 0.922    |
| <b>Comorbid Anxiety</b>        | 0.00                      | 0.479    | 0.00                      | 0.918    |
| <b>DTI Processing Pipeline</b> | 0.15                      | 0.363    | 0.16                      | 0.204    |

**Abbreviations:** UF, uncinate fasciculus; DTI, diffusion tensor imaging

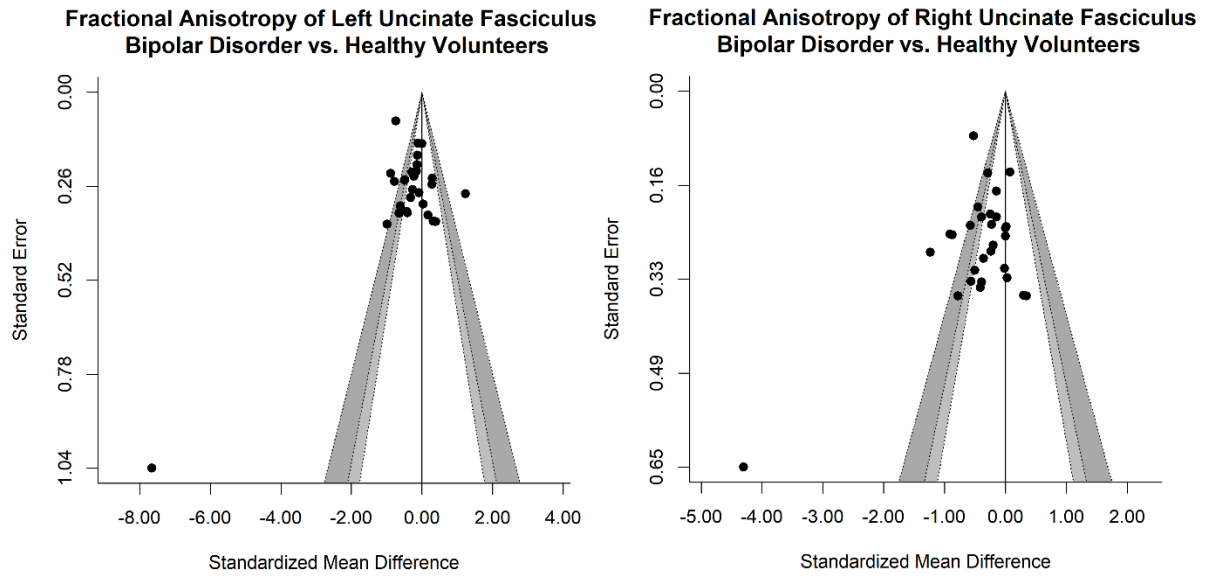

**Figure S1.** Funnel plot of fractional anisotropy in the left and right uncinate fasciculus of individuals with bipolar disorder versus healthy volunteers including the one outlier<sup>17</sup>.



## Fractional Anisotropy of Left Uncinate Fasciculus Bipolar Disorder vs. Healthy Volunteers

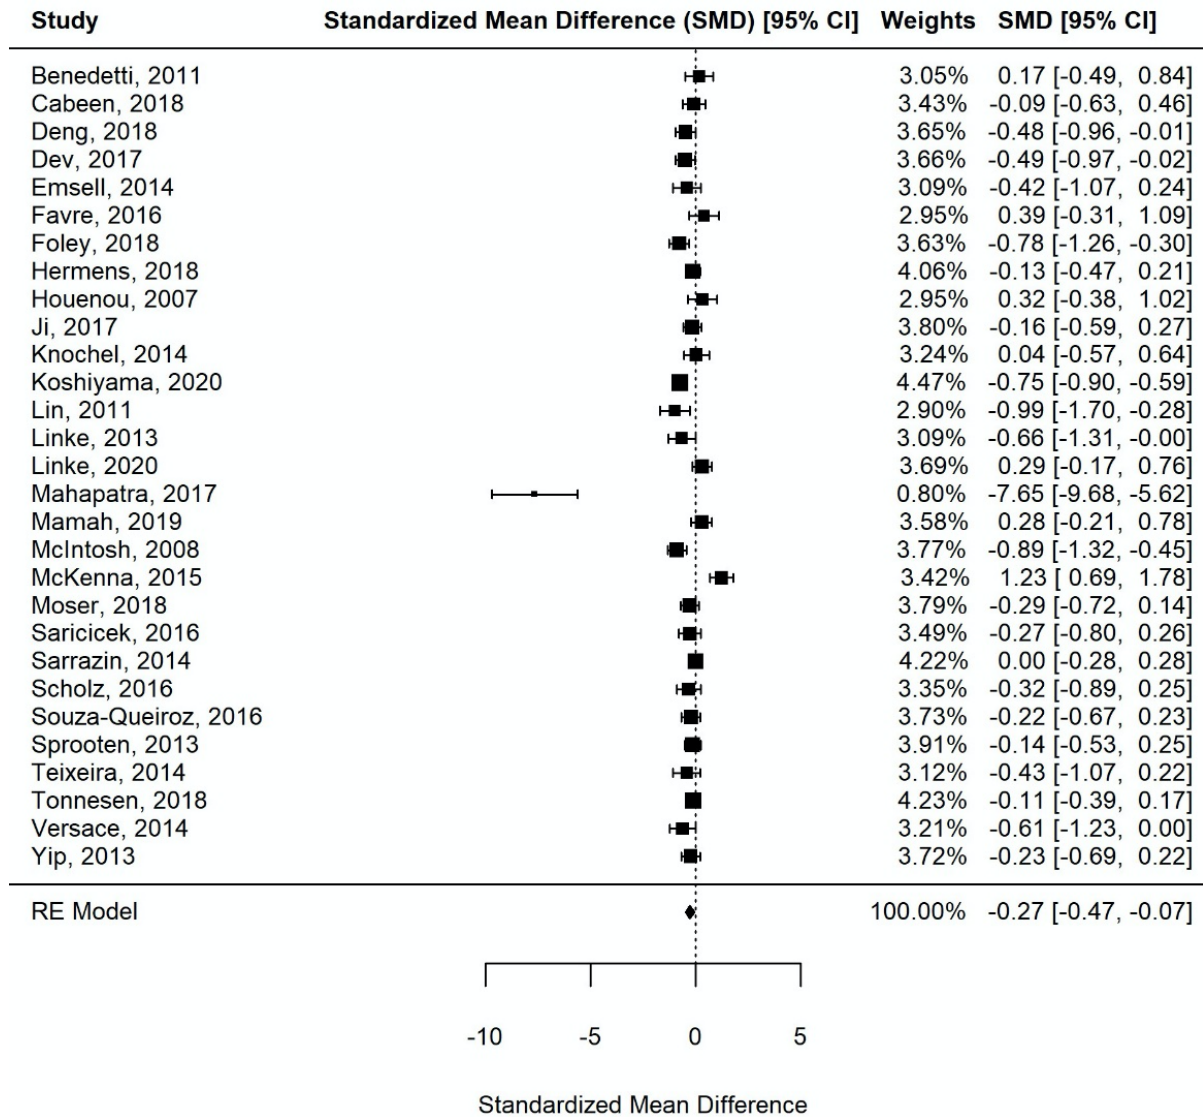

**Figure S2.** Forest plot of fractional anisotropy in the left uncinate fasciculus of individuals with bipolar disorder versus healthy volunteers including the one outlier<sup>17</sup>.

**Abbreviations:** CI, confidence interval; RE model, random-effect model.

### Fractional Anisotropy of Right Uncinate Fasciculus Bipolar Disorder vs. Healthy Volunteers

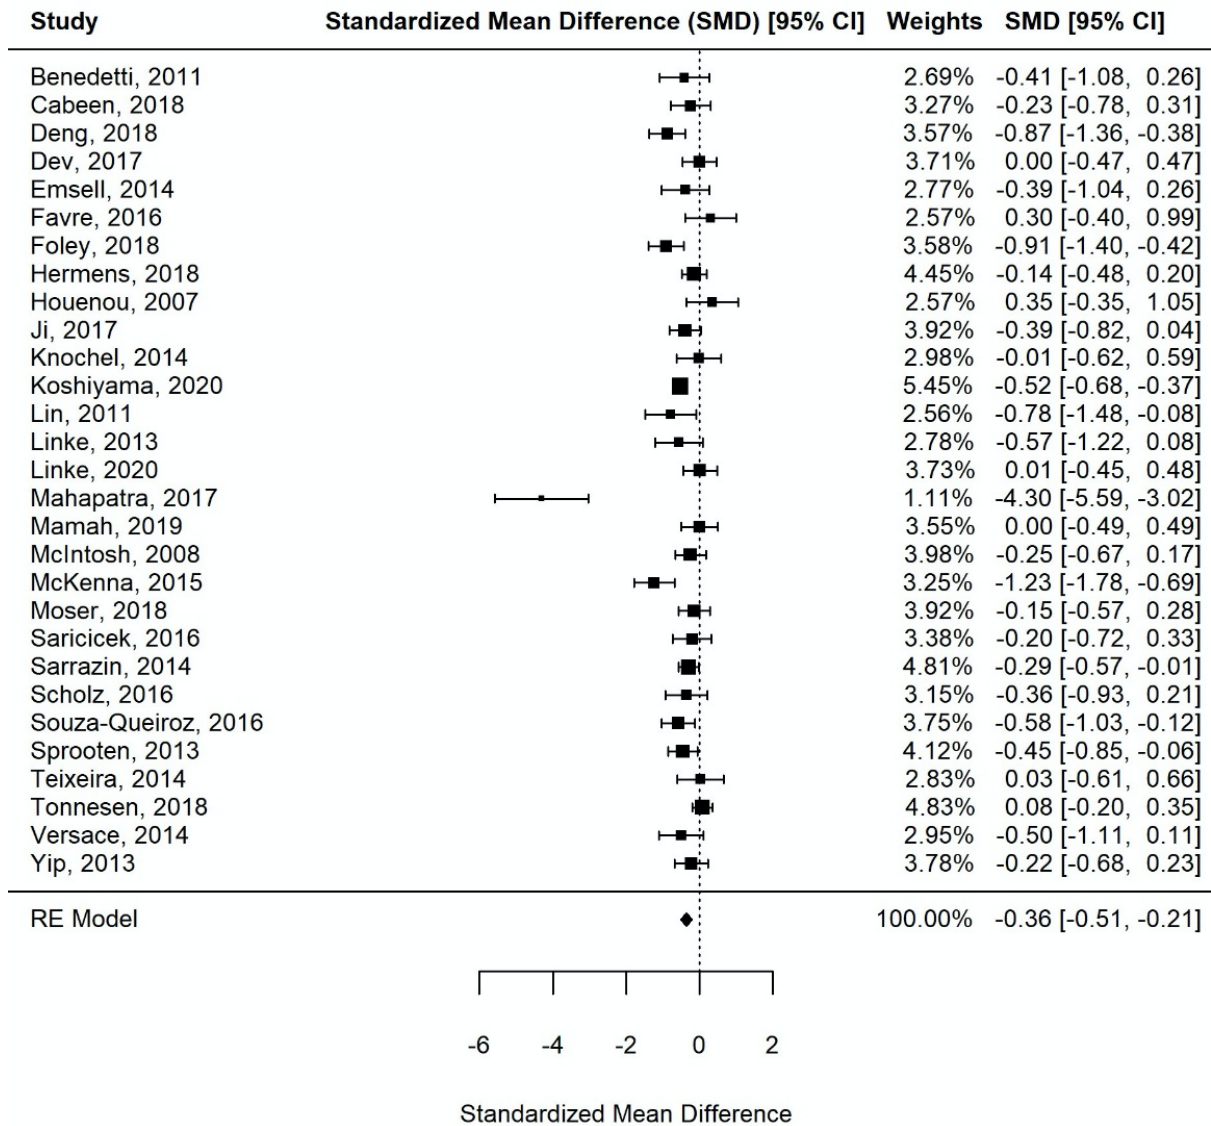

**Figure S3.** Forest plot of fractional anisotropy in the right uncinata fasciculus of individuals with bipolar disorder versus healthy volunteers including the one outlier<sup>17</sup>.

**Abbreviations:** CI, confidence interval; RE model, random-effect model.

### Fractional Anisotropy of Left Uncinate Fasciculus At-Risk Relatives vs. Healthy Volunteers

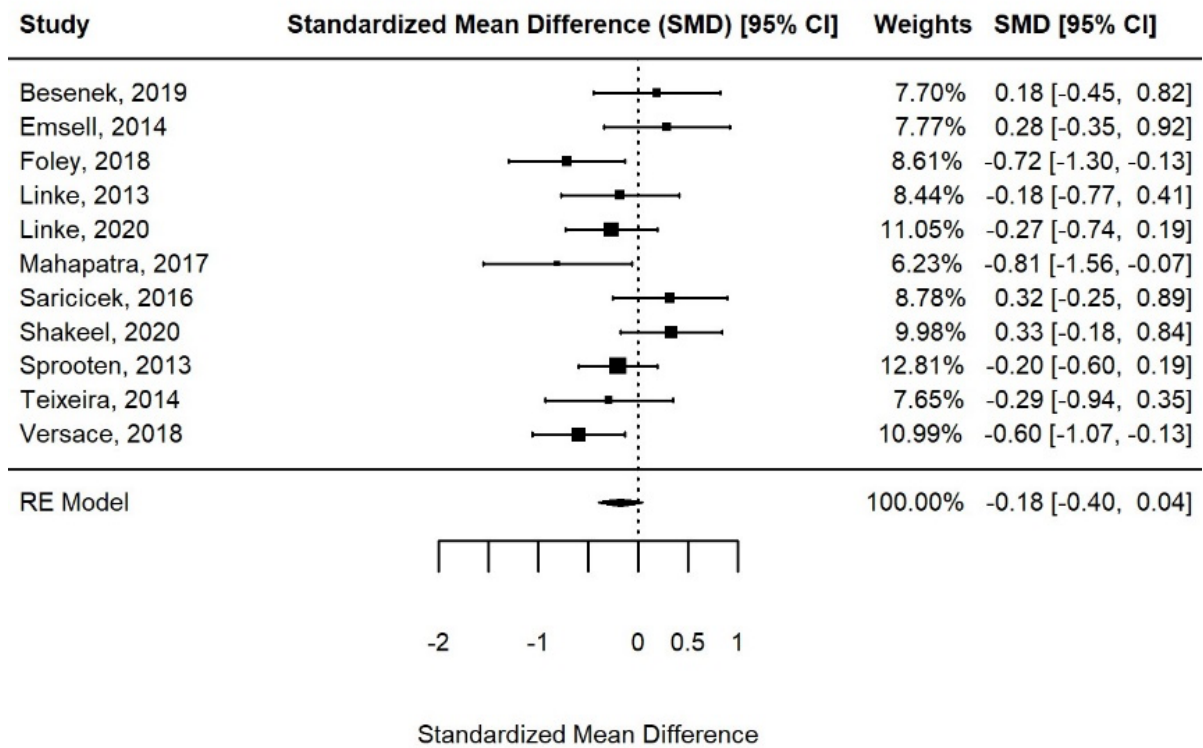

**Figure S4.** Forest plot of fractional anisotropy in the left uncinat fasciculus of at-risk relatives versus healthy volunteers.

**Abbreviations:** CI, confidence interval; RE model, random-effect model.

### Fractional Anisotropy of Right Uncinate Fasciculus At-Risk Relatives vs. Healthy Volunteers

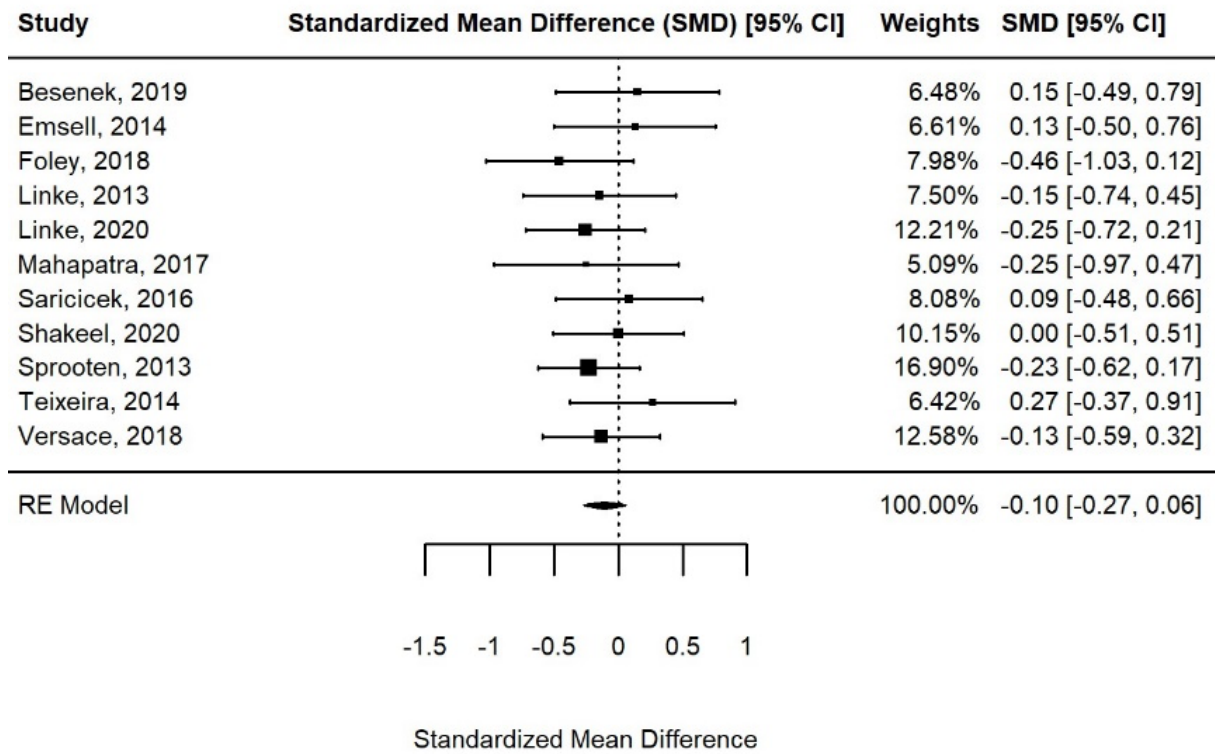

**Figure S5.** Forest plot of fractional anisotropy in the right uncinat fasciculus of at-risk relatives versus healthy volunteers.

**Abbreviations:** CI, confidence interval; RE model, random-effect model.

**Radial Diffusivity of Left Uncinate Fasciculus  
Bipolar Disorder vs. Healthy Volunteers**

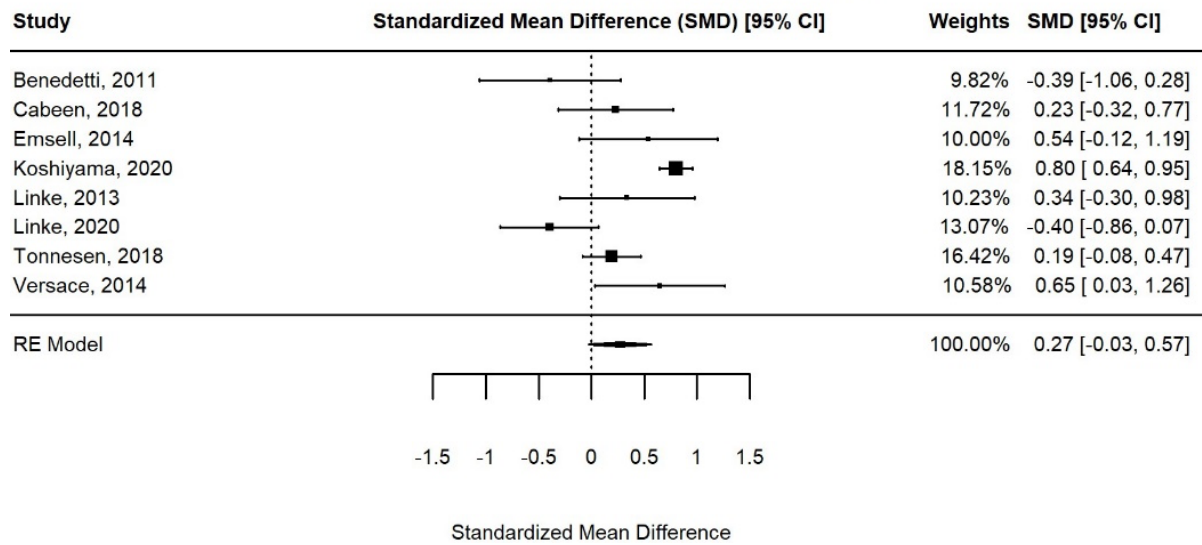

**Figure S6.** Forest plot of radial diffusivity in the left uncinate fasciculus of individuals with bipolar disorder versus healthy volunteers.

**Abbreviations:** CI, confidence interval; RE model, random-effect model.

## References

1. Benedetti, F., Absinta, M., Rocca, M. A., Radaelli, D., Poletti, S., Bernasconi, A., Dallspezia, S., Pagani, E., Falini, A., Copetti, M., Colombo, C., Comi, G., Smeraldi, E., & Filippi, M. (2011). Tract-specific white matter structural disruption in patients with bipolar disorder. *Bipolar Disorders*, *13*(4), 414–424. <https://doi.org/10.1111/j.1399-5618.2011.00938.x>
2. Besenek, M., Yilmaz, I. T., Guleryuz, H., Guney, S. A., & Inal Emiroglu, N. (2019). Anterior cingulate cortex disconnectivity in high-risk offspring of bipolar patients: A preliminary DTI study. *Dusunen Adam The Journal of Psychiatry and Neurological Sciences*, *32*(3), 203. <https://doi.org/10.14744/DAJPNS.2019.00030>
3. Cabeen, R. P., Laidlaw, D. H., Ruggieri, A., & Dickstein, D. P. (2018). Preliminary mapping of the structural effects of age in pediatric bipolar disorder with multimodal MR imaging. *Psychiatry Research: Neuroimaging*, *273*, 54–62. <https://doi.org/10.1016/j.pscychresns.2017.12.006>
4. Deng, F., Wang, Y., Huang, H., Niu, M., Zhong, S., Zhao, L., Qi, Z., Wu, X., Sun, Y., Niu, C., He, Y., Huang, L., & Huang, R. (2018). Abnormal segments of right uncinate fasciculus and left anterior thalamic radiation in major and bipolar depression. *Progress in Neuro-Psychopharmacology and Biological Psychiatry*, *81*, 340–349. <https://doi.org/10.1016/j.pnpbp.2017.09.006>
5. Dev, S. I., Nguyen, T. T., McKenna, B. S., Sutherland, A. N., Bartsch, H., Theilmann, R. J., & Eyler, L. T. (2017). Steeper Slope of Age-Related Changes in White Matter Microstructure and Processing Speed in Bipolar Disorder. *The American Journal of Geriatric Psychiatry*, *25*(7), 744–752. <https://doi.org/10.1016/j.jagp.2017.02.014>
6. Emsell, L., Chaddock, C., Forde, N., Hecke, W. V., Barker, G. J., Leemans, A., Sunaert, S., Walshe, M., Bramon, E., Cannon, D., Murray, R., & McDonald, C. (2014). White matter microstructural abnormalities in families multiply affected with bipolar I disorder: A diffusion tensor tractography study. *Psychological Medicine*, *44*(10), 2139–2150. <https://doi.org/10.1017/S0033291713002845>
7. Favre, P., Houenou, J., Baciú, M., Pichat, C., Poupon, C., Bougerol, T., & Polosan, M. (2016). White Matter Plasticity Induced by Psychoeducation in Bipolar Patients: A Controlled Diffusion Tensor Imaging Study. *Psychotherapy and Psychosomatics*, *85*(1), 58–60. <https://doi.org/10.1159/000441009>
8. Foley, S. F., Bracher-Smith, M., Tansey, K. E., Harrison, J. R., Parker, G. D., & Caseras, X. (2018). Fractional anisotropy of the uncinate fasciculus and cingulum in bipolar disorder type I, type II, unaffected siblings and healthy controls. *The British Journal of Psychiatry*, *213*(3), 548–554. <https://doi.org/10.1192/bjp.2018.101>

9. Hermens, D. F., Hatton, S. N., Lee, R. S. C., Naismith, S. L., Duffy, S. L., Paul Amminger, G., Kaur, M., Scott, E. M., Lagopoulos, J., & Hickie, I. B. (2018). In vivo imaging of oxidative stress and fronto-limbic white matter integrity in young adults with mood disorders. *European Archives of Psychiatry and Clinical Neuroscience*, *268*(2), 145–156. <https://doi.org/10.1007/s00406-017-0788-8>
10. Houenou, J., Wessa, M., Douaud, G., Leboyer, M., Chanraud, S., Perrin, M., Poupon, C., Martinot, J.-L., & Paillere-Martinot, M.-L. (2007). Increased white matter connectivity in euthymic bipolar patients: Diffusion tensor tractography between the subgenual cingulate and the amygdalo-hippocampal complex. *Molecular Psychiatry*, *12*(11), 1001–1010. <https://doi.org/10.1038/sj.mp.4002010>
11. Ji, A., Godwin, D., Rutlin, J., Kandala, S., Shimony, J. S., & Mamah, D. (2017). Tract-based analysis of white matter integrity in psychotic and nonpsychotic bipolar disorder. *Journal of Affective Disorders*, *209*, 124–134. <https://doi.org/10.1016/j.jad.2016.11.038>
12. Knöchel, C., Stäblein, M., Storchak, H., Reinke, B., Jurcoane, A., Prvulovic, D., Linden, D. E. J., van de Ven, V., Ghinea, D., Wenzler, S., Alves, G., Matura, S., Kröger, A., & Oertel-Knöchel, V. (2014). Multimodal assessments of the hippocampal formation in schizophrenia and bipolar disorder: Evidences from neurobehavioral measures and functional and structural MRI. *NeuroImage: Clinical*, *6*, 134–144. <https://doi.org/10.1016/j.nicl.2014.08.015>
13. Koshiyama, D., Fukunaga, M., Okada, N., Morita, K., Nemoto, K., Usui, K., Yamamori, H., Yasuda, Y., Fujimoto, M., Kudo, N., Azechi, H., Watanabe, Y., Hashimoto, N., Narita, H., Kusumi, I., Ohi, K., Shimada, T., Kataoka, Y., Yamamoto, M., ... Hashimoto, R. (2020). White matter microstructural alterations across four major psychiatric disorders: Mega-analysis study in 2937 individuals. *Molecular Psychiatry*, *25*(4), 883–895. <https://doi.org/10.1038/s41380-019-0553-7>
14. Lin, F., Weng, S., Xie, B., Wu, G., & Lei, H. (2011). Abnormal frontal cortex white matter connections in bipolar disorder: A DTI tractography study. *Journal of Affective Disorders*, *131*(1), 299–306. <https://doi.org/10.1016/j.jad.2010.12.018>
15. Linke, J., King, A. V., Poupon, C., Hennerici, M. G., Gass, A., & Wessa, M. (2013). Impaired Anatomical Connectivity and Related Executive Functions: Differentiating Vulnerability and Disease Marker in Bipolar Disorder. *Biological Psychiatry*, *74*(12), 908–916. <https://doi.org/10.1016/j.biopsych.2013.04.010>
16. Linke, J. O., Stavish, C., Adleman, N. E., Sarlls, J., Towbin, K. E., Leibenluft, E., & Brotman, M. A. (2020). White matter microstructure in youth with and at risk for bipolar disorder. *Bipolar Disorders*, *22*(2), 163–173. <https://doi.org/10.1111/bdi.12885>
17. Mahapatra, A., Khandelwal, S. K., Sharan, P., Garg, A., & Mishra, N. K. (2017). Diffusion tensor imaging tractography study in bipolar disorder patients compared to first-degree

- relatives and healthy controls. *Psychiatry and Clinical Neurosciences*, 71(10), 706–715. <https://doi.org/10.1111/pcn.12530>
18. Mamah, D., Ji, A., Rutlin, J., & Shimony, J. S. (2019). White matter integrity in schizophrenia and bipolar disorder: Tract- and voxel-based analyses of diffusion data from the Connectom scanner. *NeuroImage: Clinical*, 21, 101649. <https://doi.org/10.1016/j.nicl.2018.101649>
19. McIntosh, A. M., Maniega, S. M., Lymer, G. K. S., McKirdy, J., Hall, J., Sussmann, J. E. D., Bastin, M. E., Clayden, J. D., Johnstone, E. C., & Lawrie, S. M. (2008). White Matter Tractography in Bipolar Disorder and Schizophrenia. *Biological Psychiatry*, 64(12), 1088–1092. <https://doi.org/10.1016/j.biopsych.2008.07.026>
20. McKenna, B. S., Theilmann, R. J., Sutherland, A. N., & Eyler, L. T. (2015). Fusing Functional MRI and Diffusion Tensor Imaging Measures of Brain Function and Structure to Predict Working Memory and Processing Speed Performance among Inter-episode Bipolar Patients. *Journal of the International Neuropsychological Society*, 21(5), 330–341. <https://doi.org/10.1017/S1355617715000314>
21. Moser, D. A., Doucet, G. E., Lee, W. H., Rasgon, A., Krinsky, H., Leib, E., Ing, A., Schumann, G., Rasgon, N., & Frangou, S. (2018). Multivariate Associations Among Behavioral, Clinical, and Multimodal Imaging Phenotypes in Patients With Psychosis. *JAMA Psychiatry*, 75(4), 386. <https://doi.org/10.1001/jamapsychiatry.2017.4741>
22. Sarıççek, A., Zorlu, N., Yalın, N., Hıdıroğlu, C., Çavuşoğlu, B., Ceylan, D., Ada, E., Tunca, Z., & Özerdem, A. (2016). Abnormal white matter integrity as a structural endophenotype for bipolar disorder. *Psychological Medicine*, 46(7), 1547–1558. <https://doi.org/10.1017/S0033291716000180>
23. Sarrazin, S., Poupon, C., Linke, J., Wessa, M., Phillips, M., Delavest, M., Versace, A., Almeida, J., Guevara, P., Duclap, D., Duchesnay, E., Mangin, J.-F., Le Dudal, K., Daban, C., Hamdani, N., D'Albis, M.-A., Leboyer, M., & Houenou, J. (2014). A Multicenter Tractography Study of Deep White Matter Tracts in Bipolar I Disorder: Psychotic Features and Interhemispheric Disconnectivity. *JAMA Psychiatry*, 71(4), 388. <https://doi.org/10.1001/jamapsychiatry.2013.4513>
24. Scholz, V., Houenou, J., Kollmann, B., Duclap, D., Poupon, C., & Wessa, M. (2016). Dysfunctional decision-making related to white matter alterations in bipolar I disorder. *Journal of Affective Disorders*, 194, 72–79. <https://doi.org/10.1016/j.jad.2015.12.019>
25. Shakeel, M. K., MacQueen, G., Addington, J., Metz, P. D., Georgopoulos, G., Bray, S., Goldstein, B. I., MacIntosh, B. J., Wang, J., Kennedy, S. H., & Lebel, C. (2020). White Matter Connectivity in Youth at Risk for Serious Mental Illness: A Longitudinal Analysis. *Psychiatry Research: Neuroimaging*, 302, 111106. <https://doi.org/10.1016/j.pscychresns.2020.111106>



26. Souza-Queiroz, J., Boisgontier, J., Etain, B., Poupon, C., Duclap, D., d'Albis, M.-A., Daban, C., Hamdani, N., Le Corvoisier, P., Delavest, M., Bellivier, F., Guevara, P., Leboyer, M., Henry, C., & Houenou, J. (2016). Childhood trauma and the limbic network: A multimodal MRI study in patients with bipolar disorder and controls. *Journal of Affective Disorders*, *200*, 159–164. <https://doi.org/10.1016/j.jad.2016.04.038>
27. Sprooten, E., Brumbaugh, M. S., Knowles, E. E. M., McKay, D. R., Lewis, J., Barrett, J., Landau, S., Cyr, L., Kochunov, P., Winkler, A. M., Pearlson, G. D., & Glahn, D. C. (2013). Reduced White Matter Integrity in Sibling Pairs Discordant for Bipolar Disorder. *American Journal of Psychiatry*, *170*(11), 1317–1325. <https://doi.org/10.1176/appi.ajp.2013.12111462>
28. Teixeira, A. M. A., Kleinman, A., Zanetti, M., Jackowski, M., Duran, F., Pereira, F., Lafer, B., Busatto, G. F., & Caetano, S. C. (2014). Preserved white matter in unmedicated pediatric bipolar disorder. *Neuroscience Letters*, *579*, 41–45. <https://doi.org/10.1016/j.neulet.2014.06.061>
29. Tønnesen, S., Kaufmann, T., Doan, N. T., Alnæs, D., Córdova-Palomera, A., Meer, D. van der, Rokicki, J., Moberget, T., Gurholt, T. P., Haukvik, U. K., Ueland, T., Lagerberg, T. V., Agartz, I., Andreassen, O. A., & Westlye, L. T. (2018). White matter aberrations and age-related trajectories in patients with schizophrenia and bipolar disorder revealed by diffusion tensor imaging. *Scientific Reports*, *8*(1), 14129. <https://doi.org/10.1038/s41598-018-32355-9>
30. Tønnesen, S., Kaufmann, T., Lange, A.-M. G. de, Richard, G., Doan, N. T., Alnæs, D., Meer, D. van der, Rokicki, J., Moberget, T., Maximov, I. I., Agartz, I., Aminoff, S. R., Beck, D., Barch, D. M., Beresniewicz, J., Cervenka, S., Fatouros-Bergman, H., Craven, A. R., Flyckt, L., ... Westlye, L. T. (2020). Brain Age Prediction Reveals Aberrant Brain White Matter in Schizophrenia and Bipolar Disorder: A Multisample Diffusion Tensor Imaging Study. *Biological Psychiatry: Cognitive Neuroscience and Neuroimaging*, *5*(12), 1095–1103. <https://doi.org/10.1016/j.bpsc.2020.06.014>
31. Versace, A., Andreazza, A. C., Young, L. T., Fournier, J. C., Almeida, J. R. C., Stiffler, R. S., Lockovich, J. C., Aslam, H. A., Pollock, M. H., Park, H., Nimgaonkar, V. L., Kupfer, D. J., & Phillips, M. L. (2014). Elevated serum measures of lipid peroxidation and abnormal prefrontal white matter in euthymic bipolar adults: Toward peripheral biomarkers of bipolar disorder. *Molecular Psychiatry*, *19*(2), 200–208. <https://doi.org/10.1038/mp.2012.188>
32. Versace, A., Ladouceur, C. D., Graur, S., Acuff, H. E., Bonar, L. K., Monk, K., McCaffrey, A., Yendiki, A., Leemans, A., Travis, M. J., Diwadkar, V. A., Holland, S. K., Sunshine, J. L., Kowatch, R. A., Horwitz, S. M., Frazier, T. W., Arnold, L. E., Fristad, M. A., Youngstrom, E. A., ... Phillips, M. L. (2018). Diffusion imaging markers of bipolar versus general

psychopathology risk in youth at-risk. *Neuropsychopharmacology*, 43(11), 2212–2220.  
<https://doi.org/10.1038/s41386-018-0083-z>

33. Yip, S. W., Chandler, R. A., Rogers, R. D., Mackay, C. E., & Goodwin, G. M. (2013). White matter alterations in antipsychotic- and mood stabilizer-naïve individuals with bipolar II/NOS disorder. *NeuroImage: Clinical*, 3, 271–278.  
<https://doi.org/10.1016/j.nicl.2013.08.005>
